# Supplementary material for: Targeting the fatty acid binding proteins disrupts multiple myeloma cell cycle progression and MYC signaling
Source: eLife. 2023 Mar 7;12:e81184. doi: 10.7554/eLife.81184 (PMC9995119; doi:10.7554/eLife.81184)
Supplement: Supplementary file 1. [file elife-81184-supp1.xlsx]

## Sheet: Table S1
RNAseq values for FABP genes in MM.1S and RPMI8226 cells demonstrated that FABP5 (italic) is the most highly expressed.
GeneID	MM.1S	RPMI8226
FABP1	0	0
FABP2	0.019627	0
FABP3	1.40836	1.71019
FABP4	1.79097	1.94675
FABP5	98.429	24.3813
FABP6	1.27284	0.752652
FABP7	0	0
FABP9	0	0
FABP12	0	0
