# Supplementary material for: Targeting the fatty acid binding proteins disrupts multiple myeloma cell cycle progression and MYC signaling
Source: eLife. 2023 Mar 7;12:e81184. doi: 10.7554/eLife.81184 (PMC9995119; doi:10.7554/eLife.81184)
Supplement: Supplementary file 2. — Data includes the μM and logμM of human and mouse myeloma cell lines at 1, 24, 48, 72 hour timepoints. [file elife-81184-supp2.xlsx]

## Sheet: Table S2
Table S2. IC50 of myeloma cell lines treated with various doses overtime with BMS309403. Data includes the μM and logμM of human and mouse myeloma cell lines at 1, 24, 48, 72 hour timepoints.
Cell line	1 hour		24 hour		48 hour		72 hour
ENC1	Log μM	μM	Log μM	μM	Log μM	μM	Log μM	μM
5TGM1-TK	0.4153	2.60196	1.014	10.3276	1.095	12.4451	1.176	14.9968
MM.1R	0.5948	3.93369	0.9082	8.09469	1.033	10.7895	1.004	10.0925
H929	1.192	15.5597	1.397	24.9459	1.422	26.4241	1.356	22.6986
U266	1.222	16.6725	1.445	27.8612	1.456	28.5759	1.468	29.3765
Vk*MYC	1.331	21.4289	1.36	22.9087	1.098	12.5314	1.417	26.1216
MM.1S	1.078	11.9674	1.528	33.7287	1.395	24.8313	1.457	28.6418
RPMI-8226	1.172	14.8594	1.448	28.0543	1.407	25.527	1.402	25.2348
