# Supplementary material for: Targeting the fatty acid binding proteins disrupts multiple myeloma cell cycle progression and MYC signaling
Source: eLife. 2023 Mar 7;12:e81184. doi: 10.7554/eLife.81184 (PMC9995119; doi:10.7554/eLife.81184)
Supplement: Supplementary file 3. — Data includes the μM and log μM of human and mouse myeloma cell lines at 1, 24, 48, 72 hour timepoints. [file elife-81184-supp3.xlsx]

## Sheet: Table S3
Table S3. IC50 of myeloma cell lines treated with various doses overtime with SBFI-26. Data includes the μM and log μM of human and mouse myeloma cell lines at 1, 24, 48, 72 hour timepoints.
Cell line	1 hour		24 hour		48 hour		72 hour
ENC1	Log μM	μM	Log μM	μM	Log μM	μM	Log μM	μM
5TGM1-TK	1.198	15.7761	1.351	22.4388	1.278	18.9671	1.257	18.0717
MM.1R	1.244	17.5388	1.317	20.7491	1.315	20.6538	1.196	15.7036
H929	1.531	33.9625	1.737	54.5758	1.814	65.1628	1.61	40.738
U266	1.658	45.4988	1.81	64.5654	1.71	51.2861	1.614	41.115
Vk*MYC	1.546	35.156	1.648	44.4631	1.648	44.4631	1.635	43.1519
MM.1S	1.569	37.0681	1.897	78.886	1.838	68.8652	1.816	65.4636
RPMI-8226	1.536	34.3558	1.707	50.9331	1.558	36.141	1.373	23.6048
