# Supplementary material for: Targeting the fatty acid binding proteins disrupts multiple myeloma cell cycle progression and MYC signaling
Source: eLife. 2023 Mar 7;12:e81184. doi: 10.7554/eLife.81184 (PMC9995119; doi:10.7554/eLife.81184)
Supplement: Supplementary file 4. — (A) BMS309403, SBFI-26, and the combination alter gene expression levels. DEGs were determined using a false discovery rate of 0.2. [file elife-81184-supp4.xlsx]

## Sheet: Table S4
Table S4. List of genes changed by FABP inhibitors in MM.1S cells determined with RNA sequencing. A) BMS309403, SBFI-26, and the combination alter gene expression levels. DEGs were determined using a false discovery rate of 0.2 .
Black is Downregulated and Red is Upregulated by FABP inhibitors.
Gene	BMS309403		SBFI-26		BMS309403 + SBFI-26
	P Value	Fold Change	P Value	Fold Change	P Value	Fold Change
TNXIP	0.00026	-1.64	6.77e-05	-1.72	1.76e-05	-1.8
EIF5B	1.35e-05	-1.38	4.56e-05	-1.36	7.98e-06	-1.4
ANP32B	2.89e-06	-1.44	3.91e-05	-1.38	x	x
SEC11C	x	x	7.14e-05	-1.41	3.68e-06	-1.5
JCHAIN	x	x	6.09e-05	-1.42	2.73e-05	-1.44
DNAJC3	x	x	6.92e-05	-1.51	0.000724	-1.42
ENC1	6.69e-05	-2.72	x	x	5.59e-05	-2.77
APOL3	6.98e-05	-2.24	x	x	5.36e-05	-2.27
TMEM178B	1.14e-06	-2.2	x	x	1.43e-09	-2.67
CABLES1	3.85e-10	-2.13	x	x	7.86e-12	-2.3
AQP3	1.69e-07	-1.94	x	x	3.45e-10	-2.22
MYO5A	9.8e-13	-1.86	x	x	3.13e-11	-1.78
RNF10	3.58e-09	-1.72	x	x	1.12e-09	-1.75
BTN2A2	0.000311	-1.7	x	x	1.85e-05	-1.89
UBE2G1	0.000825	-1.68	x	x	0.000785	-1.68
SDC1	1.12e-10	-1.68	x	x	7.33e-10	-1.64
MYO6	8e-05	-1.63	x	x	0.000153	-1.6
KRAS	0.000103	-1.63	x	x	0.000134	-1.62
PCBP2	7.41e-10	-1.61	x	x	1.13e-09	-1.6
DDX11	7.58e-07	-1.58	x	x	1.68e-06	-1.56
MYC	2.24e-07	-1.55	x	x	2.36e-13	-1.87
XBP1	4.36e-07	-1.55	x	x	1.17e-06	-1.52
PDCD4	0.000206	-1.54	x	x	1.79e-05	-1.65
NUP210	5.48e-07	-1.53	x	x	1.72e-05	-1.44
DUSP5	1.69e-05	-1.52	x	x	2.41e-06	-1.58
NXPE3	2.23e-05	-1.51	x	x	5.11e-05	-1.49
MAN1A1	1.45e-05	-1.49	x	x	3.97e-09	-1.72
SEC14L1	8.92e-05	-1.45	x	x	0.000122	-1.44
MAF	1.48e-05	-1.43	x	x	3.62e-06	-1.47
EIF3C	0.000106	-1.43	x	x	0.000351	-1.39
RNF187	0.000172	-1.42	x	x	0.0011	-1.36
NBPF14	0.000132	-1.41	x	x	6.2e-05	-1.44
LMAN1	0.000126	-1.38	x	x	3.35e-07	-1.53
MZB1	0.000697	-1.36	x	x	4.02e-05	-1.46
HIST1H1E	0.000365	-1.36	x	x	0.000111	-1.39
NCL	5.5e-05	-1.34	x	x	1.27e-05	-1.38
HIST1H3B	0.000815	-1.34	x	x	0.000382	-1.36
HIST2H4A	0.000978	-1.34	x	x	0.00016	-1.4
ANP32E	0.000872	-1.33	x	x	0.000416	-1.36
ENO1	0.000819	-1.33	x	x	0.00051	-1.35
GPATCH4	0.000878	-1.33	x	x	6.9e-05	-1.41
CPNE5	0.000598	-2.34	x	x	x	x
RGL1	1.98e-05	-1.64	x	x	x	x
IRF1	0.000538	-1.52	x	x	x	x
PELP1	0.000303	-1.51	x	x	x	x
NPIPB5	5.97e-05	-1.48	x	x	x	x
CPEB4	4.96e-05	-1.47	x	x	x	x
INPP4A	9.7e-06	-1.44	x	x	x	x
USP48	0.000968	-1.4	x	x	x	x
CREB3L2	0.000472	-1.4	x	x	x	x
MDN1	0.000106	-1.37	x	x	x	x
GOLGA4	0.000501	-1.36	x	x	x	x
POLE3	0.000723	-1.36	x	x	x	x
GPI	0.000411	-1.36	x	x	x	x
SRSF11	0.000282	-1.35	x	x	x	x
ARHGEF12	0.000791	-1.35	x	x	x	x
MYCBP2	0.000315	-1.35	x	x	x	x
NOMO2	0.000971	-1.34	x	x	x	x
NOP56	0.000624	-1.33	x	x	x	x
CLPTM1L	0.000671	-1.33	x	x	x	x
LUC7L3	0.000267	-1.32	x	x	x	x
ANKRD12	0.000667	-1.3	x	x	x	x
HSP90AA1	0.000977	-1.29	x	x	x	x
CD38	x	x	x	x	0.000267	-2.38
IGFBP3	x	x	x	x	4.42e-05	-2.07
PIM1	x	x	x	x	0.000155	-1.9
CCDC86	x	x	x	x	6.52e-05	-1.53
SRM	x	x	x	x	0.000133	-1.52
HSP90B1	x	x	x	x	6.44e-07	-1.51
EIF3CL	x	x	x	x	0.000493	-1.48
SNORD3B-1	x	x	x	x	0.000714	-1.45
ABHD2	x	x	x	x	0.000941	-1.44
PTMAP2	x	x	x	x	2.53e-05	-1.43
HIST1H2AE	x	x	x	x	0.000844	-1.42
UTP20	x	x	x	x	0.000604	-1.42
HIST1H2AG	x	x	x	x	0.000649	-1.4
CALR	x	x	x	x	4.56e-05	-1.39
HYOU1	x	x	x	x	5.04e-05	-1.39
HIST1H3C	x	x	x	x	0.00101	-1.38
HIST1H3G	x	x	x	x	0.000519	-1.38
DDX21	x	x	x	x	0.000363	-1.37
TMED2	x	x	x	x	0.000793	-1.36
SRRT	x	x	x	x	0.000758	-1.35
MKI67	x	x	x	x	0.000333	-1.35
TCOF1	x	x	x	x	0.000963	-1.34
HIST2H2BF	x	x	x	x	0.000364	-1.33
PTMA	x	x	x	x	0.000168	-1.33
PPIB	x	x	x	x	0.000802	-1.33
HDGF	x	x	x	x	0.000426	-1.33
NOLC1	x	x	x	x	0.000463	-1.33
CD44	x	x	x	x	0.000356	1.38
VIM	x	x	x	x	2.71e-05	1.45
CCL3	x	x	x	x	0.000248	1.5
93	Total Unique Genes changed
