# Supplementary material for: Targeting the fatty acid binding proteins disrupts multiple myeloma cell cycle progression and MYC signaling
Source: eLife. 2023 Mar 7;12:e81184. doi: 10.7554/eLife.81184 (PMC9995119; doi:10.7554/eLife.81184)
Supplement: Supplementary file 5. — The fifteen pathways below were commonly dysregulated in all three treatment groups (BMS309403, SBFI-26, and the combination) compared to vehicle. Significance was determined in each treatment compared to vehicle using IPA default p-value cutoff (P<0.05) and lists of canonical pathways for each treatment group were cross-referenced with one another in Microsoft excel to generate this list. [file elife-81184-supp5.xlsx]

## Sheet: Table S5
Table S5. List of canonical pathways changed by FABP inhibitors in MM.1S cells determined by Ingenuity Pathway Analysis (IPA). The fifteen pathways below were commonly dysregulated in all three treatment groups (BMS309403, SBFI-26, and the combination) compared to vehicle. Significance was determined in each treatment compared to vehicle using IPA default p-value cutoff (p<0.05) and lists of cano…
	Common Canonical Pathways (IPA)
1	Aldosterone Signaling in Epithelial Cells
2	Antigen Presentation Pathway
3	Caveolar-mediated Endocytosis Signaling
4	Cell Cycle: G2/M DNA Damage Checkpoint Regulation
5	EIF2 Signaling
6	Endoplasmic Reticulum Stress Pathway
7	Granzyme A Signaling
8	Kinetochore Metaphase Signaling Pathway
9	Lipid Antigen Presentation by CD1
10	NER Pathway
11	Polyamine Regulation in Colon Cancer
12	Protein Ubiquitination Pathway
13	Sirtuin Signaling Pathway
14	Systemic Lupus Erythematosus Signaling
15	Unfolded protein response
