# Supplementary material for: Targeting the fatty acid binding proteins disrupts multiple myeloma cell cycle progression and MYC signaling
Source: eLife. 2023 Mar 7;12:e81184. doi: 10.7554/eLife.81184 (PMC9995119; doi:10.7554/eLife.81184)
Supplement: Supplementary file 6. — (A) STRING revealed biological pathways upregulated after BMS309403, SBFI-26, and the combination treatment. Data filtered based on false discovery rate. [file elife-81184-supp6.xlsx]

## Sheet: Table S6
Table S6. List of upregulated pathways after FABP inhibitor treatment in MM.1S cells determined with RNA sequencing. A) STRING revealed biological pathways upregulated after BMS309403, SBFI-26, and the combination treatment. Data filtered based on false discovery rate.
Upregulated biological processes with combination treatment	FDR
cellular response to interferon-gamma	0.0101
