# Supplementary material for: Targeting the fatty acid binding proteins disrupts multiple myeloma cell cycle progression and MYC signaling
Source: eLife. 2023 Mar 7;12:e81184. doi: 10.7554/eLife.81184 (PMC9995119; doi:10.7554/eLife.81184)
Supplement: Supplementary file 7. — (A) STRING analysis revealed biological processes downregulated by combination treatment. Data filtered based on false discovery rate. [file elife-81184-supp7.xlsx]

## Sheet: Table S7
Table S7. List of downregulated pathways after FABP inhibitor treatment in MM.1S cells determined by RNA sequencing. A) STRING analysis revealed biological processes downregulated by combination treatment. Data filtered based on false discovery rate.
Top 25 downregulated biological processes with combination treatment	FDR
regulation of gene expression	0.00051
endoplasmic reticulum unfolded protein response	0.0008
nucleosome organization	0.00095
protein-DNA complex subunit organization	0.00095
regulation of macromolecule biosynthetic process	0.00095
regulation of gene expression, epigenetic	0.0011
regulation of cellular macromolecule biosynthetic process	0.0011
regulation of macromolecule metabolic process	0.0011
negative regulation of cellular macromolecule biosynthetic process	0.0014
negative regulation of gene expression	0.0017
IRE1-mediated unfolded protein response	0.002
negative regulation of gene expression, epigenetic	0.002
chromatin organization involved in negative regulation of transcription	0.002
regulation of metabolic process	0.002
negative regulation of transcription, DNA-templated	0.0026
chromatin organization	0.0029
regulation of nitrogen compound metabolic process	0.0034
DNA replication-dependent nucleosome assembly	0.0035
chromatin remodeling	0.0035
negative regulation of nitrogen compound metabolic process	0.0035
regulation of biological process	0.0035
ATF6-mediated unfolded protein response	0.0036
nucleosome assembly	0.0036
regulation of gene silencing	0.0036
regulation of translation	0.0036
