# Supplementary material for: Targeting the fatty acid binding proteins disrupts multiple myeloma cell cycle progression and MYC signaling
Source: eLife. 2023 Mar 7;12:e81184. doi: 10.7554/eLife.81184 (PMC9995119; doi:10.7554/eLife.81184)
Supplement: Supplementary file 8. — Data filtered based on false discovery rate. [file elife-81184-supp8.xlsx]

## Sheet: Table S8
Table S8. RNA sequencing reveals top 10 downregulated genes with BMS309403 and SBFI-26 treatment. Data filtered based on false discovery rate.
Gene Symbol	Fold Change
ENC1	-2.76926
TMEM178B	-2.67143
CD38	-2.37643
CABLES1	-2.29588
APOL3	-2.27218
AQP3	-2.22296
IGFBP3	-2.0671
PIM1	-1.90092
BTN2A2	-1.88768
MYC	-1.8653
