# Supplementary material for: Targeting the fatty acid binding proteins disrupts multiple myeloma cell cycle progression and MYC signaling
Source: eLife. 2023 Mar 7;12:e81184. doi: 10.7554/eLife.81184 (PMC9995119; doi:10.7554/eLife.81184)
Supplement: Supplementary file 9. — (A) BMS309403, SBFI-26, and the combination alter gene expression levels. Data determined using |fold change|>1.2, and P-value ≥0.05. [file elife-81184-supp9.xlsx]

## Sheet: Table S9
Table S9. Protein expression changes due to 48 hour exposure to FABP inhibitors in MM.1S cells determined with mass spectrometry. A) BMS309403, SBFI-26, and the combination alter gene expression levels. Data determined using |fold change| > 1.2, and p-value ≥0.05.
Comparison	FDR≤0.2	Upregulated	Downregulated
		Fold Change ≥ 1.2	Fold Change ≤-1.2
BMS vs MM	339	162	177
SBFI vs MM	145	51	94
BMS + SBFI vs MM	414	199	215
			898
Total Genes changed (some overlap)
See Supp Table 12-18 for list of genes.
