# Supplementary material for: Targeting the fatty acid binding proteins disrupts multiple myeloma cell cycle progression and MYC signaling
Source: eLife. 2023 Mar 7;12:e81184. doi: 10.7554/eLife.81184 (PMC9995119; doi:10.7554/eLife.81184)
Supplement: Supplementary file 10. — Data determined using |fold change|>1.2, and P-value ≥0.05. [file elife-81184-supp10.xlsx]

## Sheet: Table S10
Table S10. List of 162 upregulated proteins after 48 hour exposure to BMS309403 in MM.1S cells determined with mass spectrometry proteomic analysis. Data determined using |fold change| > 1.2, and p-value ≥0.05.
Gene	BMS309403
	P Value	Fold Change
KRT1	0.00403	3.37039
NAGA	0.0165	3.34576
MAIP1	0.00185	3.17831
SH3KBP1	0.02858	2.89236
DIABLO	0.00331	2.70358
RASA3	0.0015	2.40405
AK3	0.00621	2.18567
NUP155	0.00923	2.15585
HBA1	9.4498e-06	2.13376
F13A1	0.01033	2.08801
MYO1D	0.03207	2.07265
RPF2	0.04453	2.06392
ACTC1	0.00296	2.00054
NDUFS8	0.02838	1.97188
SYMPK	0.00218	1.96494
UQCC1	0.0072	1.81394
APOBEC3C	0.00021	1.81147
COG5	0.01798	1.79061
PNKP	0.00269	1.77495
PSMD5	0.00982	1.7476
RCL1	0.04671	1.72566
TOMM40	0.00871	1.704
RMD3	0.03542	1.69803
F5	0.00091	1.68563
ARL6IP5	0.00927	1.67501
ALB	2.7712e-05	1.66712
HDAC2	0.02389	1.67178
HBB	0.00019	1.66514
FLNA	0.0036	1.65851
IMPDH1	0.0311	1.65696
ELMOD2	0.00139	1.6471
COQ9	1.5373e-05	1.64581
DDX51	0.0095	1.63661
TIMM23	0.04547	1.63617
PTPN1	0.02553	1.63509
TMEM43	0.00902	1.63336
APMAP	0.00529	1.63202
PDIA5	0.02941	1.61633
ARHGAP6	0.00099	1.61514
MRPS17	0.0382	1.60733
OSTC	0.00842	1.60008
F2	0.00128	1.5919
MX1	0.02206	1.57998
SRP14	0.04776	1.57722
PPP1R12A	0.02835	1.57493
DOCK4	0.00085	1.56314
DEPTOR	0.00046	1.55695
ACAD9	0.01368	1.54232
TAF15	0.02224	1.52695
PIGK	0.04231	1.52469
MT-ND4	0.01837	1.51531
CASP10	0.02333	1.51151
SUN2	0.00225	1.49922
SLC25A22	0.02453	1.49147
ANXA4	0.02904	1.49123
SSBP	0.00131	1.48079
ABHD12	0.03858	1.47684
M6PR	0.01143	1.46004
SRP54	0.01623	1.44417
TRAM1	0.00269	1.44194
SURF4	0.00055	1.42599
CD44	0.0007	1.42368
RPS29	0.01524	1.41776
RAB1B	0.03901	1.40655
ALG2	0.01674	1.39697
CYFIP2	0.00504	1.39506
PMPCA	0.00025	1.38361
DNPH1	0.01621	1.3759
ALG5	0.00104	1.37204
CYBB	0.02936	1.37185
KDSR	0.00283	1.3662
GALNT2	0.00675	1.36177
COMT	0.02192	1.36048
MGST3	0.00115	1.35641
NDUFS3	0.00158	1.35572
PBXIP1	1.4077e-05	1.35556
IVD	0.0365	1.35451
SCARB2	0.00194	1.35444
CTNNBL1	0.02405	1.35073
STT3A	0.01637	1.3481
RHOT1	9.5326e-05	1.34789
FNTA	0.00983	1.34188
DCTD	0.03618	1.34172
ALDH5A1	0.00967	1.34014
HSD17B12	0.0027	1.33686
PCYOX1	0.03742	1.33547
CPT2	0.00172	1.33394
PDS5B	0.0319	1.33385
PEX11B	0.01634	1.3255
HSP90B1	0.00418	1.3246
TMED10	0.00939	1.32448
AARS2	0.00192	1.31707
HAX1	0.00911	1.31683
PRKRA	0.00116	1.31127
ITIH2	0.00243	1.30953
PRPF4	0.00058	1.30934
THBS1	0.01753	1.30853
ANXA2	0.00336	1.30241
NIPSNAP1	0.00775	1.30212
VIM	1.0247e-08	1.29981
CLIC4	0.01356	1.29917
UQCRQ	4.5408e-05	1.29673
ACTBL2	0.00053	1.29388
SLC25A12	0.00412	1.29267
MRPL47	0.0299	1.29257
IFIH1	0.03546	1.29245
LAMP5	0.03601	1.28877
EXOC4	0.02607	1.28529
PRAF2	8.694e-05	1.28227
TUFM	0.00959	1.28121
DNAJC3	0.04922	1.27989
EPHX1	0.00698	1.27346
CTSC	7.5046e-05	1.26929
ZMPSTE24	1.702e-05	1.26852
TM9SF2	0.01232	1.26802
ARHGAP18	0.00625	1.26731
AIMP2	0.01226	1.26635
MVP	0.00033	1.25979
UBE2H	0.00251	1.2594
ACSF3	0.00355	1.25731
HEXA	0.00032	1.25571
FAM3C	0.0062	1.25336
GTPBP1	0.01264	1.25335
TMED7	0.00118	1.25096
PGRMC2	0.00927	1.24993
CSRP1	0.01462	1.24785
MLEC	1.3536e-05	1.24753
SSR4	0.00026	1.24734
SULT1A4	0.00133	1.24682
KDELR1	0.0046	1.24648
SQOR	5.0242e-07	1.24559
NDUFA10	0.00436	1.24502
MT-CO2	0.01484	1.24269
CYC1	0.01043	1.24212
GRN	0.04313	1.23889
CMAS	0.01422	1.23857
CCL3	0.02896	1.23655
TMED9	0.0007	1.2347
ATP5F1C	2.222e-05	1.23169
TAP2	0.00205	1.22664
MRPL43	0.00981	1.22548
RAB35	0.01206	1.22262
VWA8	0.04281	1.21933
TRIP10	0.01155	1.21776
RPN2	0.00073	1.21667
SSR1	0.00359	1.21633
CAD	0.01103	1.21631
PRKCSH	0.04195	1.21496
WDR1	0.00127	1.21414
NUP58	0.01171	1.21204
PRDX4	0.00165	1.21202
MRPS10	0.00946	1.20944
NCLN	0.00057	1.20916
CAPN2	2.1902e-06	1.2071
PLEC	0.00079	1.20635
NEK7	0.00083	1.20625
SLC25A1	7.2009e-06	1.20571
MRPL48	0.00467	1.20552
MTCH2	0.00018	1.2051
RARS	0.03001	1.203
SLC25A11	3.7369e-07	1.20151
SLC25A4	1.6879e-05	1.2009
