# Supplementary material for: Targeting the fatty acid binding proteins disrupts multiple myeloma cell cycle progression and MYC signaling
Source: eLife. 2023 Mar 7;12:e81184. doi: 10.7554/eLife.81184 (PMC9995119; doi:10.7554/eLife.81184)
Supplement: Supplementary file 11. — Data determined using |fold change|>1.2, and P-value ≥0.05. [file elife-81184-supp11.xlsx]

## Sheet: Table S11
Table S11. List of 51 upregulated proteins after 48 hour exposure to SBFI-26 in MM.1S cells determined with mass spectrometry proteomic analysis. Data determined using |fold change| > 1.2, and p-value ≥0.05.
Gene	SBFI-26
	P Value	Fold Change
CREG1	0.03713	3.56726
MAIP1	0.02363	2.58154
OCIAD2	0.04695	2.41341
OGA	0.01058	2.27442
PPID	0.04471	2.09956
ACTC1	0.00292	2.05988
RBM19	0.02322	2.03824
STRN	0.01283	1.97959
PFN2	0.04765	1.82413
MIA3	0.02907	1.75948
MAD2L1BP	0.00392	1.73047
ELMOD2	9.4206e-05	1.70508
MRPS17	0.02215	1.68686
ZBTB38	0.03617	1.68619
RTN4	0.0156	1.65261
TEX10	0.03222	1.62814
APOBEC3C	0.00842	1.56244
LARP7	0.02403	1.5573
ERBIN	0.04992	1.55023
RANBP9	0.01218	1.50582
ABCB7	0.03	1.49509
CCL3	0.00038	1.48368
GALNT2	0.0048	1.44571
NOA1	0.01021	1.43675
DHFR	0.01041	1.41888
CYC1	0.00376	1.41876
DNPH1	0.0144	1.38526
COQ9	0.00309	1.35896
RAB21	0.02114	1.35008
HBA1	5.1173e-05	1.33286
HLA-A	0.00152	1.30885
TAP2	0.00038	1.30425
SSBP1	0.01623	1.30309
FNTA	0.02275	1.28692
F11R	0.00014	1.28397
GOLPH3	0.03205	1.28328
TAPBP	0.01125	1.27259
ALB	0.00888	1.26389
ARHGDIB	0.04341	1.26028
COQ8A	0.01985	1.25475
PARP4	0.03124	1.24461
CYB5R1	0.04337	1.2441
ALG5	0.02934	1.2318
GMFG	0.03864	1.22493
HNRNPF	0.01728	1.2243
PRPF8	1.4133e-06	1.21616
MT-CO2	0.03607	1.20934
PRKRA	0.01693	1.20758
NDUFB1	0.046	1.20605
ME1	0.03787	1.20273
ACSF3	0.00359	1.21738
