# Supplementary material for: Targeting the fatty acid binding proteins disrupts multiple myeloma cell cycle progression and MYC signaling
Source: eLife. 2023 Mar 7;12:e81184. doi: 10.7554/eLife.81184 (PMC9995119; doi:10.7554/eLife.81184)
Supplement: Supplementary file 12. — (A) BMS309403, SBFI-26, and the combination alter protein expression levels. Data determined using |fold change|>1.2, and P-value ≥0.05. [file elife-81184-supp12.xlsx]

## Sheet: Table S12
Table S12. List of 199 upregulated proteins after 48 hour exposure to BMS309403 and SBFI-26 in MM.1S cells determined with mass spectrometry proteomic analysis. A) BMS309403, SBFI-26, and the combination alter protein expression levels. Data determined using |fold change| > 1.2, and p-value ≥0.05.
Gene	BMS309403 + SBFI-26
	P Value	Fold Change
NCAPD3	0.009	2.93146
SH3KBP1	0.03153	2.80275
HBA1	1.0871e-09	2.39785
P4HA1	0.01871	2.14631
F5	6.2806e-08	2.04909
MRPS6	0.01903	2.04614
CCL3	4.4102e-06	1.9348
FGB	9.2832e-07	1.90772
ALB	0.00037	1.83444
ESYT1	0.0371	1.83253
PDIA5	0.00132	1.82896
PZP	0.0045	1.81996
ELMOD2	0.00017	1.81151
COQ9	1.929e-06	1.79734
GNL2	0.02987	1.77851
APOBEC3C	0.00124	1.77577
UQCC1	0.01514	1.76442
HBB	1.1628e-09	1.7557
ARL6IP5	0.00476	1.75339
ACTC1	0.04296	1.74657
CD44	0.00017	1.73028
CRYL1	0.01119	1.72297
MRPS17	0.02342	1.68099
SSBP1	0.00158	1.67416
FN1	9.4543e-05	1.65521
ESD	0.03897	1.65452
CLASP1	0.04792	1.65159
ANXA4	0.00234	1.62925
NSDHL	0.00808	1.62595
F2	9.3729e-05	1.62572
TOMM40	0.0239	1.61373
PNKP	0.01215	1.6078
IMPDH1	0.0281	1.59572
APMAP	0.00907	1.58159
GRN	6.3119e-05	1.57721
GLA	0.00969	1.57318
ACTR1A	0.01629	1.56598
DHRS7B	0.03005	1.54586
DCTD	0.00041	1.53246
ACAD9	0.02329	1.52703
SLC25A22	0.04787	1.52553
SUN2	0.00421	1.52221
TAPBP	4.4397e-06	1.51536
PMPCA	8.0429e-07	1.51513
PSMD5	0.03149	1.51257
TAF15	0.01598	1.5055
PBXIP1	6.3917e-05	1.49889
SURF4	2.2623e-05	1.49834
SRP54	0.00332	1.49467
ARHGAP6	0.00604	1.49321
STT3A	3.2389e-11	1.48162
M6PR	0.0168	1.47655
ABCB7	0.04804	1.46107
ALDH5A1	8.4623e-05	1.45914
DNPH1	0.00587	1.45838
NIPSNAP1	4.0586e-05	1.44321
CIAO2A	0.04772	1.4372
NFS1	0.01095	1.43499
ITGB1	0.04589	1.42681
CYFIP2	0.00298	1.42623
PCYOX1	0.01316	1.42371
CPT2	8.9149e-07	1.42329
STS	0.03881	1.42097
HAX1	0.00139	1.4179
MRPL43	0.00029	1.41496
RCC1	0.00426	1.41156
CAMK2G	0.04595	1.41087
LSS	0.03856	1.41042
YARS	0.03161	1.41024
DEPTOR	0.04445	1.40814
GK	0.00341	1.40727
HEXA	5.7497e-07	1.4069
UQCRH	0.01562	1.40684
EEFSEC	0.02993	1.40246
MVP	3.1001e-06	1.39822
VIM	3.9241e-10	1.38206
BASP1	0.02189	1.37959
GLB1	0.00802	1.37399
ARPC3	2.0982e-05	1.37014
TRAM1	0.00787	1.36802
IVD	0.01348	1.36634
MGST3	1.8703e-05	1.35939
UQCRQ	7.3583e-05	1.35751
FKBP8	0.02997	1.35467
ITIH2	0.00078	1.35273
PGRMC2	0.00053	1.35022
FNTA	0.01059	1.34935
RAB21	0.04525	1.33737
GTPBP1	0.00026	1.33502
LEMD3	0.02392	1.33501
IFIH1	0.00499	1.33375
ILVBL	0.01246	1.33076
NOC4L	0.0214	1.3283
LMNA	7.5657e-05	1.32742
PON2	0.00769	1.32384
NAXE	0.01884	1.32319
CYB5R1	0.02233	1.32083
ACOT9	0.01282	1.31973
FHOD1	0.00314	1.31538
ACTBL2	0.0003	1.31214
PCK2	0.03585	1.30922
MCCC2	1.4951e-05	1.30761
SSR1	9.5981e-07	1.30759
LMAN2	6.0694e-07	1.30751
GALNT2	0.02922	1.30739
TRIM72	0.00818	1.30662
MRPL38	0.00013	1.30558
FLOT2	0.04458	1.30157
ARHGAP18	0.00128	1.30152
SULT1A4	0.00032	1.29979
MYO18A	0.00273	1.29968
TUFM	0.00677	1.298
ALG2	0.04638	1.29699
LAMP5	0.02895	1.29634
HLA-A	2.4464e-06	1.29436
CAD	0.03184	1.29174
PRPF4	0.00014	1.29127
TAP2	0.002	1.2903
MRPL48	0.00238	1.28763
GMFG	0.02693	1.28739
AIMP2	0.00178	1.28713
MAP4	0.04589	1.28592
PSAT1	2.8313e-06	1.28394
TIMM44	0.00015	1.28371
AARS2	0.00036	1.2823
SLC25A12	0.02181	1.28069
FAM3C	0.00087	1.27883
ALG5	0.02619	1.27803
SQOR	1.4915e-09	1.27651
SLC25A10	0.02032	1.27394
SLC25A11	0.00066	1.2728
TM9SF2	0.00194	1.27149
CTSC	9.9773e-05	1.27089
RAB24	0.01855	1.27084
MTHFD1L	0.00129	1.26863
F11R	9.4634e-06	1.26441
ARF5	0.00524	1.26425
SDHB	0.04992	1.26202
WDR1	1.4069e-05	1.26129
PRAF2	4.6026e-05	1.2606
MARCKS	0.01936	1.25313
NCLN	0.00094	1.25312
MT-ATP6	4.6406e-08	1.25304
LGALS1	7.5006e-06	1.25115
RPN2	0.00023	1.24922
RAP1B	0.00494	1.24914
HSD17B12	0.01421	1.24815
FUCA1	0.00133	1.24715
UQCRB	0.00068	1.24557
ACSL3	0.0027	1.24522
ASNS	2.2276e-06	1.245
PLEC	4.1346e-05	1.24486
ANXA2	0.01456	1.24417
NTPCR	0.02305	1.24334
UROD	0.00447	1.24258
KARS	0.00192	1.24229
HSP90B1	0.03325	1.24224
LYPLAL1	0.00148	1.24209
SARS	0.00216	1.24103
NNT	5.9986e-05	1.23974
TRIP10	0.00777	1.23801
SSR4	0.0036	1.23652
NTMT1	0.02172	1.23345
NOMO2	6.1636e-06	1.23279
HCCS	0.00258	1.23262
SLC25A4	9.18e-05	1.23201
CYC1	0.0415	1.23193
SULT1A1	0.00507	1.23119
GMPPB	6.0553e-05	1.22945
NCF4	0.00097	1.2291
GLUD1	0.03573	1.22908
MACROD1	0.00035	1.22752
ECH1	0.00019	1.22744
GNB2	0.00215	1.22685
PSMD12	1.3877e-05	1.22673
TMED7	0.00348	1.22344
DNAJB11	0.01105	1.22332
PPP6C	4.7767e-05	1.2233
NARS	0.00366	1.22285
ZMPSTE24	9.5275e-05	1.22229
CAPNS1	0.00079	1.22113
CMAS	0.0022	1.22101
ATP5F1C	0.00428	1.21761
PRKCSH	0.01402	1.21395
HNRNPH2	0.00021	1.21348
SLC25A1	1.4869e-06	1.21265
BLVRB	8.8731e-05	1.21224
FHL1	0.00408	1.21217
PIGS	2.708e-05	1.20804
DECR1	0.00046	1.20687
PRDX4	0.00374	1.20554
CDIPT	2.341e-06	1.20528
GNS	0.00146	1.20351
BAP18	0.00148	1.20339
MRPL47	0.01947	1.20327
LONP1	0.00265	1.20273
VPS26A	0.01058	1.20217
RPL13A	0.01103	1.20171
HMGCL	0.02824	1.20169
