# Supplementary material for: Targeting the fatty acid binding proteins disrupts multiple myeloma cell cycle progression and MYC signaling
Source: eLife. 2023 Mar 7;12:e81184. doi: 10.7554/eLife.81184 (PMC9995119; doi:10.7554/eLife.81184)
Supplement: Supplementary file 13. — Data determined using |fold change|>1.2, and P-value ≥0.05. [file elife-81184-supp13.xlsx]

## Sheet: Table S13
Table S13. List of 177 downregulated proteins after 48 hour exposure to BMS309403 in MM.1S cells determined with mass spectrometry proteomic analysis. Data determined using |fold change| > 1.2, and p-value ≥0.05.
Gene	BMS309403
	P Value	Fold Change
LIMD1	0.02668	-5.08524
SURF1	0.00984	-5.06807
HDGFL2	0.02062	-3.17121
UBXN7	0.04615	-2.58655
DIEXF	0.00451	-2.57578
CCDC124	0.04601	-2.4679
SUMO2	0.00395	-2.46468
DDRGK1	0.03395	-2.32518
CUTC	0.03582	-2.24228
CHCHD2P9	2.7768e-07	-2.16891
BCS1L	0.03675	-2.14326
MSH2	0.03095	-2.08254
FAM207A	0.01418	-2.05775
USP15	0.00751	-2.0382
JMJD6	0.01877	-2.00132
HIST1H3A	0.013	-1.89292
TATDN1	4.5592e-05	-1.85145
SNRPD2	0.01547	-1.85097
LRWD1	0.00032	-1.83083
PDS5A	0.03104	-1.82203
NF1	0.02754	-1.82158
UBE2T	0.00117	-1.80428
MECP2	0.02644	-1.78103
CAT	0.01853	-1.74855
MIF	0.00814	-1.74418
HK2	0.03102	-1.73553
RBM28	6.8687e-05	-1.72274
JSRP1	0.02411	-1.7206
LYAR	0.01463	-1.70116
TRABD	0.04361	-1.69949
SDC1	0.00432	-1.68115
ATP11C	0.03321	-1.65171
CEP97	0.00288	-1.64314
STAU1	0.00906	-1.63767
C11orf98	0.03598	-1.62183
NASP	0.0319	-1.61892
GATAD2B	0.00243	-1.61159
NSUN5	0.00409	-1.58435
ILKAP	0.0407	-1.56163
HDAC1	0.04843	-1.55896
MKI67	1.3999e-08	-1.55645
PM20D2	0.00717	-1.54463
SNRPE	0.03786	-1.52885
SRRM2	6.2203e-05	-1.51984
SNX5	0.04446	-1.51712
RBBP5	0.02198	-1.49889
CDK1	0.00012	-1.49052
PDCD6IP	0.02695	-1.47238
CPSF1	0.02031	-1.46571
NOL7	0.01651	-1.46219
RER1	0.00652	-1.4588
LUC7L3	0.00074	-1.45197
SF3B4	0.02556	-1.44705
RRM2	5.3503e-06	-1.43685
RPS21	8.4479e-05	-1.43632
SUPT6H	0.03076	-1.43435
TBCA	0.0355	-1.42477
PSPH	0.0018	-1.41279
YBX1	5.2196e-05	-1.41243
SAFB	0.00839	-1.41214
PSMB1	8.7294e-06	-1.41188
TERF2	0.00197	-1.40747
POLR1E	0.01906	-1.40743
PTMA	0.00041	-1.40694
B2M	0.04745	-1.40232
EIF3D	0.0041	-1.39917
TRMT1	0.00249	-1.39912
DUT	1.3548e-08	-1.39352
PKP2	0.00114	-1.38838
DDX23	0.00467	-1.38539
POLR3C	0.02704	-1.37898
TAGLN2	9.2853e-06	-1.37184
CHMP4B	3.7723e-05	-1.36545
STX7	0.0415	-1.36249
GNAS	0.04987	-1.36153
DRAP1	3.3767e-06	-1.35835
SRSF6	0.02966	-1.35687
PSMB5	0.00228	-1.3486
CCT7	0.03094	-1.34714
CTSB	0.03191	-1.33807
COX17	0.00086	-1.33539
PPP6R3	0.04243	-1.33476
PGP	0.04465	-1.33436
RPS18	0.0113	-1.33371
NDUFS6	0.02323	-1.32879
SNRPA1	5.9214e-07	-1.32739
KIF11	0.04952	-1.32381
CHAF1B	0.00463	-1.31879
FUBP1	2.9283e-07	-1.31567
DPP9	0.00149	-1.31521
ATXN2L	9.1145e-05	-1.31076
RPA2	4.5777e-06	-1.30811
SLC9A3R1	3.1838e-06	-1.30789
TRUB1	0.03976	-1.30399
TIA1	0.00143	-1.30302
EIF4B	9.6458e-05	-1.30287
H2AFV	0.00029	-1.30147
ARMC6	0.00094	-1.29993
PDXP	0.03576	-1.29902
GTF2F1	0.03681	-1.29847
PSMD4	0.01192	-1.29709
PDE12	0.00091	-1.2964
PIN4	0.00293	-1.29543
RPL26	0.00748	-1.29429
NUDT21	0.0087	-1.29116
WIPF1	0.02321	-1.29069
PRDX2	2.6098e-05	-1.28914
RPRD2	0.00213	-1.28587
SEPTIN9	0.0009	-1.28343
EIF3A	0.01661	-1.28148
EIF3F	0.00022	-1.27857
SLIRP	0.02955	-1.27704
TIMM8B	0.0004	-1.27702
SF3B2	0.03107	-1.27496
NAA50	0.03203	-1.27298
MRPS15	0.00831	-1.27295
FASN	0.00468	-1.27022
RRP15	0.01447	-1.26916
EBNA1BP2	0.04028	-1.26914
PABPN1	5.9733e-05	-1.26848
PFDN5	5.8942e-06	-1.26677
RRM1	0.00135	-1.2645
RPS19	0.02401	-1.26275
CSDE1	0.0008	-1.26115
TXNRD1	0.00134	-1.25819
PCBP3	0.00083	-1.25682
UHRF1	0.00022	-1.25655
RPS28	4.1923e-05	-1.25374
DDX21	0.00453	-1.25358
SUPT5H	0.03018	-1.25261
FAH	0.0144	-1.25218
WBP11	0.00083	-1.24861
RPL18	0.00018	-1.24575
GOSR1	0.00572	-1.245
MAPRE1	0.03331	-1.24491
PFDN2	3.423e-05	-1.24458
SERBP1	5.6348e-05	-1.24432
TPM3	0.00598	-1.24424
RPS2	0.0004	-1.24406
HCFC1	0.00589	-1.24382
RPSA	6.4152e-07	-1.24172
RPS24	0.03807	-1.24125
PDCD5	6.6302e-06	-1.23772
PARK7	3.1938e-08	-1.23687
NIT2	0.03266	-1.23626
RRBP1	2.8823e-05	-1.23601
CIAPIN1	0.00254	-1.236
GLO1	0.00759	-1.23139
SBDS	0.00699	-1.23013
MAT2A	0.01404	-1.22751
SF1	4.954e-07	-1.22689
HNRNPA2B1	1.1593e-05	-1.22681
CSTF2	0.04655	-1.22516
TFRC	0.00117	-1.22453
LARP1	0.00013	-1.22215
RPL8	3.049e-05	-1.22202
JPT2	0.0002	-1.22145
CRYBB1	6.6167e-06	-1.22118
SRSF2	0.00226	-1.22067
DRG1	5.1684e-05	-1.21923
CBX3	6.3053e-08	-1.21923
ETF1	9.5824e-05	-1.21761
TYMS	0.0166	-1.21583
CBFB	0.00012	-1.21386
FKBP1A	0.00058	-1.21271
GOT2	0.01308	-1.21209
TXNDC9	8.5737e-06	-1.21178
DNAJC7	0.02039	-1.21116
SFPQ	1.6946e-06	-1.21074
SMC1A	0.02321	-1.20673
CDC73	0.00216	-1.20623
EIF2S1	0.01757	-1.20345
PABPC1	1.2625e-05	-1.20319
PSIP1	0.02524	-1.20101
CCT4	0.00048	-1.20086
EXOSC9	0.00201	-1.20068
PPT1	0.02973	-1.20001
