# Supplementary material for: Targeting the fatty acid binding proteins disrupts multiple myeloma cell cycle progression and MYC signaling
Source: eLife. 2023 Mar 7;12:e81184. doi: 10.7554/eLife.81184 (PMC9995119; doi:10.7554/eLife.81184)
Supplement: Supplementary file 14. — Data determined using |fold change|>1.2, and P-value ≥0.05. [file elife-81184-supp14.xlsx]

## Sheet: Table S14
Table S14. List of 94 downregulated proteins after 48 hour exposure to SBFI-26 in MM.1S cells determined with mass spectrometry proteomic analysis. Data determined using |fold change| > 1.2, and p-value ≥0.05.
Gene	SBFI-26
	P Value	Fold Change
SURF1	0.00792	-6.14793
HIST1H1C	0.04841	-5.74723
RGS10	0.01215	-5.63163
G3BP2	0.00179	-4.56209
SLC7A1	0.03258	-3.23937
PAK2	0.00581	-2.83487
METTL16	0.00084	-2.57117
TMEM214	0.00098	-2.54995
PRPS1	0.00083	-2.50595
GOLT1B	5.6648e-06	-2.22745
PPM1G	4.5043e-05	-2.18698
SUMO2	0.01296	-2.12907
UTP20	0.00256	-2.11087
DIEXF	0.0146	-2.0381
EHBP1L1	0.0047	-2.02586
LMF2	0.01995	-1.92076
ATP11C	0.02086	-1.8635
EBP	0.03956	-1.84251
TRAF3IP3	0.02704	-1.8206
CHCHD2P9	6.0556e-06	-1.82012
VPS29	2.6328e-05	-1.8132
SLC33A1	0.00925	-1.81228
GNL1	0.01845	-1.80933
PYCR3	0.01456	-1.78583
MTX1	0.01342	-1.7493
UCK2	0.00671	-1.68483
GAK	0.01991	-1.67326
LYAR	0.01493	-1.65497
BOP1	0.00069	-1.57852
SRSF6	0.02829	-1.57245
TATDN1	0.00041	-1.5545
PDCD6IP	0.04004	-1.47074
PANK4	0.03049	-1.44692
SEMA4A	0.01585	-1.44498
MRPL21	0.00037	-1.43047
EHD4	0.03397	-1.42544
TRMT1	0.03063	-1.42164
MRPS27	0.00082	-1.40531
CPT1A	0.04961	-1.38386
LRWD1	0.02926	-1.38267
SRP19	1.1604e-05	-1.37623
TIAL1	0.0431	-1.37256
SND1	2.136e-06	-1.35989
CTSB	0.04398	-1.35776
NDRG3	0.00308	-1.35697
UTP18	0.00213	-1.35241
SF3B3	0.043	-1.34343
MRPL47	0.00015	-1.33752
PSMA4	8.8329e-06	-1.3361
RPS4X	2.0897e-07	-1.333
SLC1A5	8.0756e-05	-1.33042
TCOF1	0.01342	-1.32978
SLC2A1	2.1976e-05	-1.32967
NDUFA10	0.00021	-1.327
GANAB	4.0954e-06	-1.316
MTDH	0.03013	-1.31017
HIBADH	2.4312e-05	-1.30051
ACIN1	0.00234	-1.29837
LBR	0.0015	-1.29378
NOC2L	0.0196	-1.29164
PSMD7	8.9108e-05	-1.28408
PARK7	6.2934e-05	-1.28296
HM13	0.00575	-1.27942
SART3	0.0002	-1.27914
PSMB2	0.03613	-1.27391
PIN4	0.01846	-1.26453
RPL7A	0.00063	-1.25636
SUPT4H1	0.00075	-1.25597
AP2M1	1.0658e-07	-1.2546
CDK1	0.04898	-1.25381
GAMT	0.04682	-1.25185
CCM2	0.00299	-1.24813
SRRM2	0.01153	-1.24733
MKI67	0.00022	-1.24686
PKP2	0.02654	-1.24054
GHITM	0.02904	-1.23924
PPP1R8	0.0023	-1.23806
AAAS	0.02086	-1.23756
SDCBP	0.00823	-1.23428
GARS	0.00123	-1.22072
ISOC2	7.3902e-05	-1.21853
EXOSC10	0.00322	-1.21845
CASP8	1.106e-05	-1.2182
PTMA	0.00475	-1.21322
RPS21	0.01499	-1.20973
BDH1	0.00313	-1.20905
TSFM	0.00177	-1.20779
SDF2	0.02149	-1.20557
RO60	0.04503	-1.20511
CBX3	0.03776	-1.20508
TAGLN2	0.00584	-1.20245
GOT2	0.01118	-1.20217
ARPC2	0.02865	-1.20135
SLC1A4	0.01695	-1.20109
