# Supplementary material for: Targeting the fatty acid binding proteins disrupts multiple myeloma cell cycle progression and MYC signaling
Source: eLife. 2023 Mar 7;12:e81184. doi: 10.7554/eLife.81184 (PMC9995119; doi:10.7554/eLife.81184)
Supplement: Supplementary file 15. — Data determined using |fold change|>1.2, and P-value ≥0.05. [file elife-81184-supp15.xlsx]

## Sheet: Table S15
Table S15. List of 215 downregulated proteins after 48 hour exposure to BMS309403 and SBFI-26 in MM.1S cells determined with mass spectrometry proteomic analysis. Data determined using |fold change| > 1.2, and p-value ≥0.05.
Gene	BMS309403 + SBFI-26
	P Value	Fold Change
LIMD1	0.03263	-4.29133
CHCHD2P9	3.7524e-09	-4.07295
JMJD6	0.00339	-3.11189
HDAC1	0.0014	-2.87442
WDR26	0.00735	-2.81303
DNAJC9	0.01129	-2.61387
FAM207A	0.00227	-2.55227
PTPA	0.02213	-2.53163
BCS1L	0.01314	-2.47755
MSH2	0.00815	-2.33734
CDK1	0.00047	-2.29969
VAMP3	0.02727	-2.2851
TATDN1	6.4364e-06	-2.20756
KEAP1	0.03377	-2.13923
UBE2T	0.00036	-2.10299
SDC1	0.00194	-2.05516
RPL31	0.00061	-2.04129
RPL7L1	0.04519	-2.03464
CYP51A1	0.0156	-2.00031
YTHDF2	0.00433	-1.98145
MIF	0.00184	-1.94893
RNASEH2A	0.03504	-1.91259
MKI67	2.3689e-11	-1.91138
BUD23	0.01369	-1.9086
TK1	0.04589	-1.8965
SRSF6	0.00802	-1.76737
HK2	0.03538	-1.76186
RRM2	3.1655e-07	-1.76007
RBBP5	0.01698	-1.75318
TRABD	0.03633	-1.72605
SF3B3	0.00043	-1.72531
ZNRD2	0.04586	-1.71462
MAGED2	0.04948	-1.71435
NASP	0.02309	-1.70182
YBX3	0.02789	-1.68945
NOL7	0.00095	-1.68089
NF1	0.02447	-1.67744
LRWD1	0.00765	-1.67141
SRRM2	4.4888e-05	-1.64968
MCMBP	0.016	-1.6408
KIF11	0.01276	-1.63767
CAPRIN1	0.00016	-1.63662
JPT1	0.00857	-1.63156
RBM28	0.0002	-1.62441
SNX5	0.03506	-1.61232
RBM38	0.03704	-1.60157
POLR3C	0.00855	-1.59759
GRWD1	0.0302	-1.59324
RRM1	0.0025	-1.59321
GMPS	0.01059	-1.58024
DUT	4.7532e-08	-1.5793
FAR1	0.0306	-1.57081
GAPVD1	0.04	-1.54399
RER1	0.02592	-1.53357
LAMP2	0.00522	-1.51733
CHAF1B	0.01107	-1.50352
STK26	0.01196	-1.49767
CD320	0.00294	-1.49678
TRMT1	0.00319	-1.49246
YBX1	2.6603e-05	-1.4889
EBNA1BP2	0.01633	-1.48657
EIF4B	5.9919e-06	-1.46904
TAGLN2	1.4826e-06	-1.46777
CEP97	0.01651	-1.465
TIAL1	0.02864	-1.44663
EIF3D	0.00245	-1.44542
FASN	0.0012	-1.44196
NOLC1	0.02367	-1.43967
PTMA	1.8751e-05	-1.43957
CPSF1	0.04762	-1.43893
GATAD2B	0.00987	-1.43816
LUC7L3	0.00019	-1.43299
GTF2F1	0.00198	-1.42234
MRPS31	0.02248	-1.41748
ZNF207	0.01593	-1.41663
RPS21	5.5048e-05	-1.41572
RPS18	0.0054	-1.41565
CSTF2	0.01773	-1.41543
CRYBB1	3.5496e-11	-1.41519
SNRPA1	1.1176e-07	-1.4147
WBP11	4.0159e-06	-1.41459
DDX21	9.9626e-05	-1.40394
EDC4	0.04342	-1.40305
UTP14A	0.04241	-1.39347
KDM2A	0.03734	-1.39284
SAFB	0.00839	-1.3898
RBM12	0.00477	-1.38966
DDX18	6.2802e-05	-1.38802
NDUFS6	0.00268	-1.38552
EIF2B1	0.00032	-1.3832
EIF3F	3.0495e-05	-1.38112
TCOF1	0.01859	-1.37797
UHRF1	5.9753e-09	-1.37631
RPP30	0.03602	-1.37185
TYMS	0.00062	-1.3574
BTF3	0.02148	-1.3569
TXNDC9	3.5101e-07	-1.35565
PCBP3	7.644e-05	-1.35562
ARMC6	0.00059	-1.35511
POLR1E	6.6066e-06	-1.35427
RAD23A	0.01412	-1.34838
PPP6R3	0.02023	-1.34837
URB2	0.03025	-1.34709
SRSF2	0.00865	-1.34497
RPS28	3.0925e-06	-1.34426
SMC2	0.001	-1.34211
STMN1	4.6533e-07	-1.33743
PIN4	0.00342	-1.3369
SERBP1	4.4432e-05	-1.33359
RPL26	0.0004	-1.33116
PSAP	0.00396	-1.32774
SLC9A3R1	4.702e-07	-1.32745
RBM39	0.00024	-1.32526
NME2	0.02714	-1.32469
CHMP4B	0.00059	-1.32207
GHITM	0.00598	-1.32069
DNAJC7	0.0001	-1.31993
EXOSC2	0.00017	-1.31759
CDC73	0.00012	-1.31587
CBX3	3.1325e-05	-1.30817
SF1	2.9597e-08	-1.30506
PDCD5	5.2768e-06	-1.30176
RPRD2	0.00014	-1.3011
PABPC1	4.5901e-07	-1.29958
SF3B2	0.02606	-1.29737
PFDN2	3.2911e-07	-1.29717
TERF2	0.00199	-1.29522
TPM3	0.0046	-1.29497
DRAP1	0.00016	-1.29336
KPNA2	0.0278	-1.29292
EXOSC9	0.00029	-1.28806
EEF1B2	0.00173	-1.28471
PYCR3	0.00983	-1.28391
WDR77	0.00303	-1.28378
TFRC	0.00107	-1.28365
PABPN1	3.3024e-06	-1.2816
RPA2	0.04982	-1.27938
KDM1A	0.04602	-1.2787
CSDE1	2.5095e-05	-1.27867
PDE12	0.00319	-1.27654
RPL23A	0.01842	-1.27583
CIAPIN1	0.00292	-1.27556
SEPTIN9	0.00015	-1.27301
PKP2	0.00745	-1.2717
PDXP	0.04021	-1.27145
PCBP2	4.8541e-07	-1.27023
PSMG1	0.00055	-1.26987
EIF3A	0.02308	-1.26493
ACOT7	2.1241e-06	-1.2633
U2AF1	9.0984e-07	-1.26171
GOSR1	0.00578	-1.26153
RPL24	6.2058e-06	-1.26127
FUBP1	1.1632e-05	-1.26102
PSMB1	0.00255	-1.26041
SKP1	0.03625	-1.25969
API5	7.3502e-06	-1.2586
RPS9	0.0108	-1.25767
RRBP1	7.3124e-05	-1.25666
SNAP23	0.03948	-1.25646
NAA50	0.0168	-1.24974
CCT4	2.7436e-05	-1.24837
LUC7L2	0.04777	-1.24827
PFDN5	2.239e-06	-1.24762
ATXN2L	0.00403	-1.2463
EIF3B	0.00315	-1.24624
JPT2	9.4215e-07	-1.2444
DDX5	0.00024	-1.24384
CBFB	3.5461e-05	-1.24375
RPL39P5	0.00035	-1.24076
RBM3	0.00038	-1.23881
RFC2	0.02991	-1.23818
HGS	0.00719	-1.23775
SMC4	0.00233	-1.2365
EIF3C	6.6692e-06	-1.23563
MAPRE1	0.04263	-1.23516
DDX3X	4.4554e-09	-1.23511
TIA1	3.3028e-06	-1.23405
EIF4A1	0.00058	-1.23197
NUDT21	0.01342	-1.23186
CHERP	0.00039	-1.2304
DPP9	0.02216	-1.22976
DRG1	0.00145	-1.22763
G3BP1	1.3774e-07	-1.22673
PARK7	5.5255e-08	-1.2261
ANP32B	0.00299	-1.22609
TSTA3	0.04061	-1.22568
RPSA	9.8919e-07	-1.22547
HNRNPAB	2.3345e-05	-1.22469
SNX1	0.04263	-1.2242
DDX42	4.4148e-06	-1.22299
CACYBP	0.00114	-1.22291
NSFL1C	0.00153	-1.22276
WDR12	0.00014	-1.2222
HNRNPA1	9.5109e-08	-1.22032
PSMB5	0.01096	-1.2202
CD48	0.00063	-1.21855
SRRM1	0.00604	-1.21595
MCM2	0.00992	-1.21412
FABP5	2.539e-06	-1.2138
ADSS	1.4018e-06	-1.21357
ATG3	4.7294e-05	-1.21325
NCAPD2	0.04687	-1.21273
SRSF1	3.1011e-06	-1.21192
PCNP	2.3173e-06	-1.21129
PAICS	0.00189	-1.2095
HNRNPA2B1	0.00015	-1.20892
TMX2	0.00606	-1.20869
FAU	2.5972e-06	-1.20841
RRP15	0.04665	-1.20763
ASF1B	6.9774e-05	-1.20743
ECD	0.00028	-1.20543
RBM8A	9.4459e-06	-1.20531
CDV3	0.00952	-1.2043
LARP1	0.00034	-1.20197
ZRANB2	0.01198	-1.20188
