# Supplementary material for: Targeting the fatty acid binding proteins disrupts multiple myeloma cell cycle progression and MYC signaling
Source: eLife. 2023 Mar 7;12:e81184. doi: 10.7554/eLife.81184 (PMC9995119; doi:10.7554/eLife.81184)
Supplement: Supplementary file 16. — Data determined using |fold change|>1.2, and P-value ≥0.05. [file elife-81184-supp16.xlsx]

## Sheet: Table S16
Table S16. List of commonly upregulated proteins after 48 hour exposure to FABP inhibitors in MM.1S cells determined with mass spectrometry proteomics. Data determined using |fold change| > 1.2, and p-value ≥0.05.
Gene	BMS309403		SBFI-26		BMS309403 + SBFI-26
	P Value	Fold Change	P Value	Fold Change	P Value	Fold Change
ALB	2.7712e-05	1.66712	0.00888	0.791208	0.00037	1.83444
ALG5	0.00104	1.37204	0.02934	0.811817	0.02619	1.27803
APOBEC3C	0.00021	1.81147	0.00842	0.640026	0.00124	1.77577
CCL3	0.02896	1.23655	0.00038	0.673999	4.4102e-06	1.9348
COQ9	1.5373e-05	1.64581	0.00309	0.735854	1.929e-06	1.79734
CYC1	0.01043	1.24212	0.00376	0.704841	0.0415	1.23193
DNPH1	0.01621	1.3759	0.0144	0.721888	0.00587	1.45838
ELMOD2	0.00139	1.6471	9.4206e-05	0.586481	0.00017	1.81151
FNTA	0.00983	1.34188	0.02275	0.777051	0.01059	1.34935
GALNT2	0.00675	1.36177	0.0048	0.691703	0.02922	1.30739
HBA1	9.4498e-06	2.13376	5.1173e-05	0.750267	1.0871e-09	2.39785
MRPS17	0.0382	1.60733	0.02215	0.592816	0.02342	1.68099
SSBP1	0.00131	1.48079	0.01623	0.767405	0.00158	1.67416
TAP2	0.00205	1.22664	0.00038	0.766723	0.002	1.2903
ACTC1	0.00296	2.00054	0.00292	2.05988	0.04296	1.74657
