# Supplementary material for: Targeting the fatty acid binding proteins disrupts multiple myeloma cell cycle progression and MYC signaling
Source: eLife. 2023 Mar 7;12:e81184. doi: 10.7554/eLife.81184 (PMC9995119; doi:10.7554/eLife.81184)
Supplement: Supplementary file 17. — Data determined using |fold change|>1.2, and P-value ≥0.05. [file elife-81184-supp17.xlsx]

## Sheet: Table S17
Table S17. List of commonly downregulated proteins after 48 hour exposure to FABP inhibitors in MM.1S cells determined with mass spectrometry proteomics. Data determined using |fold change| > 1.2, and p-value ≥0.05.
Gene	BMS309403		SBFI-26		BMS309403 + SBFI-26
	P Value	Fold Change	P Value	Fold Change	P Value	Fold Change
CHCHD2P9	2.7768e-07	-2.16891	6.0556e-06	-1.82012	3.7524e-09	-4.07295
CBX3	6.3053e-08	-1.21923	0.03776	-1.20508	3.1325e-05	-1.30817
CDK1	0.00012	-1.49052	0.04898	-1.25381	0.00047	-2.29969
LRWD1	0.00032	-1.83083	0.02926	-1.38267	0.00765	-1.67141
MKI67	1.3999e-08	-1.55645	0.00022	-1.24686	2.3689e-11	-1.91138
PARK7	3.1938e-08	-1.23687	6.2934e-05	-1.28296	5.5255e-08	-1.2261
PIN4	0.00293	-1.29543	0.01846	-1.49052	0.00342	-1.3369
PKP2	0.00114	-1.38838	0.02654	-1.49052	0.00745	-1.2717
PTMA	0.00041	-1.40694	0.00475	-1.49052	1.8751e-05	-1.43957
RPS21	8.4479e-05	-1.43632	0.01499	-1.20973	5.5048e-05	-1.41572
SRRM2	6.2203e-05	-1.51984	0.01153	-1.24733	4.4888e-05	-1.64968
SRSF6	0.02966	-1.35687	0.02829	-1.57245	0.00802	-1.76737
TAGLN2	9.2853e-06	-1.37184	0.00584	-1.20245	1.4826e-06	-1.46777
TATDN1	4.5592e-05	-1.85145	0.00041	-1.5545	6.4364e-06	-2.20756
TRMT1	0.00249	-1.39912	0.03063	-1.20245	0.00319	-1.49246
