# Supplementary material for: Targeting the fatty acid binding proteins disrupts multiple myeloma cell cycle progression and MYC signaling
Source: eLife. 2023 Mar 7;12:e81184. doi: 10.7554/eLife.81184 (PMC9995119; doi:10.7554/eLife.81184)
Supplement: Supplementary file 18. [file elife-81184-supp18.xlsx]

## Sheet:  Table S18
Table S18. List of top 10 most significant upstream regulators predicted from IPA analysis of proteomic data in MM.1S cells exposed to BMS309403.
Upstream regulator	BMS309403
	Predicted Activation State	Activation z-score	p-value of overlap
MYC	Inhibited	-5.8	1.98e-42
LARP1	Activated	5.003	1.92e-34
TP53	Not given	0.293	3.96e-31
RICTOR	Not given	0.875	2.01e-24
MYCN	Inhibited	-5.583	7.61e-24
CD3	Not given	1.25	1.54e-23
HNF4A	Activated	2.466	1.45e-22
E2F1	Inhibited	-2.047	4.1e-19
MLXIPL	Inhibited	-4.61	4.48e-17
NFE2L2	Not given	-0.636	6.33e-17
