# Supplementary material for: Targeting the fatty acid binding proteins disrupts multiple myeloma cell cycle progression and MYC signaling
Source: eLife. 2023 Mar 7;12:e81184. doi: 10.7554/eLife.81184 (PMC9995119; doi:10.7554/eLife.81184)
Supplement: Supplementary file 19. [file elife-81184-supp19.xlsx]

## Sheet: Table S19
Table S19. List of top 10 most significant upstream regulators predicted from IPA analysis of proteomic data in MM.1S cells exposed to SBFI-26.
Upstream regulator	SBFI-26
	Predicted Activation State	Activation z-score	p-value of overlap
MYC	Inhibited	-4.632	2.37e-80
HNF4A	Activated	0.228	4.51e-76
LARP1	Activated	3.923	4.67e-72
TP53	Not given	-0.424	1.66e-67
RICTOR	Not given	1.102	1.69e-59
CST5	Not given	-0.18	6.82e-48
MYCN	Inhibited	-3.949	1.68e-45
UQCC3	Not given	Not given	1.96e-36
CD3	Not given	0.633	6.04e-35
XBP1	Inhibited	-2.698	1.69e-34
E2F1	Not given	-1.589	1.49e-33
