# Supplementary material for: Targeting the fatty acid binding proteins disrupts multiple myeloma cell cycle progression and MYC signaling
Source: eLife. 2023 Mar 7;12:e81184. doi: 10.7554/eLife.81184 (PMC9995119; doi:10.7554/eLife.81184)
Supplement: Supplementary file 20. [file elife-81184-supp20.xlsx]

## Sheet:  Table S20
Table S20. List of top 10 most significant upstream regulators predicted from IPA analysis of proteomic data in MM.1S cells exposed to BMS309403 + SBFI-26.
Upstream regulator	BMS309403 + SBFI-26
	Predicted Activation State	Activation z-score	p-value of overlap
MYC	Inhibited	-5.943	8e-48
LARP1	Activated	3.923	4.67e-72
TP53	Not given	-0.424	1.66e-67
RICTOR	Not given	1.192	9.19e-30
MYCN	Inhibited	-6.395	1.25e-28
HNF4A	Activated	2.5	2.24e-23
CD3	Not given	0.886	2.57e-20
MLXIPL	Inhibited	-5.341	2.83e-20
E2F1	Inhibited	-3.105	5e-19
YAP1	Not given	-0.978	9.65e-19
NFE2L2	Not given	0.562	4.35e-17
