# Supplementary material for: Targeting the fatty acid binding proteins disrupts multiple myeloma cell cycle progression and MYC signaling
Source: eLife. 2023 Mar 7;12:e81184. doi: 10.7554/eLife.81184 (PMC9995119; doi:10.7554/eLife.81184)
Supplement: Supplementary file 21. [file elife-81184-supp21.xlsx]

## Sheet: Table S21
Table S21. 171 Molecules dysregulated by MYC with BMS309403 as identified by Ingenuity Pathway Analysis from RNAseq data.
Entrez Gene Name	Gene Symbol - human (HUGO / HGNC / Entrez Gene)/Gene Symbol - rat (Entrez Gene)	Expr p-value	Expr Fold Change
ATP binding cassette subfamily E member 1	ABCE1	0.0435261	-1.29096
ATP binding cassette subfamily F member 1	ABCF1	0.00486475	-1.32186
aldolase, fructose-bisphosphate A	ALDOA	0.0052931	-1.27406
angiopoietin 2	ANGPT2	0.0425461	-1.68934
ankyrin repeat domain 17	ANKRD17	0.00582214	-1.24906
amyloid beta precursor protein	APP	0.00926539	-1.24836
argininosuccinate synthase 1	ASS1	0.0285475	-1.41945
ATPase family AAA domain containing 3A	ATAD3A	0.00437467	-1.38518
activating transcription factor 4	ATF4	0.0139834	-1.23186
BOP1 ribosomal biogenesis factor	BOP1	0.0373834	-1.37116
BUB1 mitotic checkpoint serine/threonine kinase	BUB1	0.0422663	-1.23026
BUB1 mitotic checkpoint serine/threonine kinase B	BUB1B	0.00576095	-1.3105
complement C1q binding protein	C1QBP	0.00727227	-1.33307
calnexin	CANX	0.00876414	-1.23986
cyclin D2	CCND2	0.00698811	-1.25413
chaperonin containing TCP1 subunit 3	CCT3	0.00371339	-1.27592
cyclin dependent kinase 6	CDK6	0.0128123	-1.22892
carbohydrate sulfotransferase 15	CHST15	0.0122084	-1.2824
clustered mitochondria homolog	CLUH	0.027397	-1.33075
CCHC-type zinc finger nucleic acid binding protein	CNBP	0.0135618	-1.245
centriolin	CNTRL	0.040863	-1.27638
carnitine palmitoyltransferase 1A	CPT1A	0.0108961	-1.54609
cold shock domain containing E1	CSDE1	0.00325868	-1.34397
cytochrome c, somatic	CYCS	0.00600303	-1.26337
DNA damage inducible transcript 4	DDIT4	0.00993637	-1.45426
DEAD/H-box helicase 11	DDX11	7.58282e-07	-1.58025
DEAD-box helicase 18	DDX18	0.0375295	-1.27384
DExD-box helicase 21	DDX21	0.00149031	-1.3254
DExD-box helicase 39B	DDX39B	0.0486141	-1.26448
DEAD-box helicase 3 X-linked	DDX3X	0.021712	-1.23048
dihydrofolate reductase	DHFR	0.0179882	-1.29865
DNA methyltransferase 1	DNMT1	0.00917629	-1.25452
dual specificity phosphatase 5	DUSP5	1.69382e-05	-1.51812
E2F transcription factor 2	E2F2	0.0151609	-1.33062
eukaryotic translation elongation factor 2	EEF2	0.00627011	-1.28064
elongation factor Tu GTP binding domain containing 2	EFTUD2	0.0205205	-1.34581
eukaryotic translation initiation factor 3 subunit D	EIF3D	0.0185853	-1.26646
eukaryotic translation initiation factor 4A1	EIF4A1	0.00321339	-1.27405
eukaryotic translation initiation factor 4 gamma 1	EIF4G1	0.00461641	-1.25781
enolase 1	ENO1	0.000818579	-1.3335
enhancer of zeste 2 polycomb repressive complex 2 subunit	EZH2	0.0298678	-1.24826
forkhead box M1	FOXM1	0.0315853	-1.33451
glyceraldehyde-3-phosphate dehydrogenase	GAPDH	0.0115062	-1.24186
phosphoribosylglycinamide formyltransferase, phosphoribosylglycinamide synthetase, phosphoribosylaminoimidazole synthetase	GART	0.0275562	-1.26415
GDP dissociation inhibitor 2	GDI2	0.00330768	-1.26858
golgi glycoprotein 1	GLG1	0.0497863	-1.33572
glucose-6-phosphate isomerase	GPI	0.000410568	-1.3565
H4 clustered histone 14	HIST2H4A	0.000978445	-1.33689
major histocompatibility complex, class I, A	HLA-A	0.00518982	-1.2532
major histocompatibility complex, class I, B	HLA-B	0.00769083	-1.24438
high mobility group AT-hook 1	HMGA1	0.00779559	-1.28049
heterogeneous nuclear ribonucleoprotein A1	HNRNPA1	0.0134277	-1.26885
heterogeneous nuclear ribonucleoprotein A2/B1	HNRNPA2B1	0.00401495	-1.25489
heterogeneous nuclear ribonucleoprotein A/B	HNRNPAB	0.00469003	-1.26629
heterogeneous nuclear ribonucleoprotein D	HNRNPD	0.00749969	-1.24397
heterogeneous nuclear ribonucleoprotein H1	HNRNPH1	0.00762903	-1.25775
heterogeneous nuclear ribonucleoprotein U	HNRNPU	0.0018356	-1.26518
heat shock protein 90 alpha family class A member 1	HSP90AA1	0.000977155	-1.28588
heat shock protein family A (Hsp70) member 9	HSPA9	0.00555563	-1.2978
heat shock protein family D (Hsp60) member 1	HSPD1	0.00502434	-1.27338
heat shock protein family H (Hsp110) member 1	HSPH1	0.00438384	-1.25447
isocitrate dehydrogenase (NADP(+)) 2	IDH2	0.00565022	-1.34525
immunoglobulin lambda like polypeptide 1	IGLL5	0.0133747	-1.23896
IKAROS family zinc finger 1	IKZF1	0.0144973	-1.42773
importin 7	IPO7	0.0303702	-1.25867
KRAS proto-oncogene, GTPase	KRAS	0.000102854	-1.63091
lactate dehydrogenase B	LDHB	0.0181812	-1.22772
methionine adenosyltransferase 2A	MAT2A	0.00488651	-1.28775
MCL1 apoptosis regulator, BCL2 family member	MCL1	0.00315703	-1.31413
minichromosome maintenance complex component 5	MCM5	0.0299997	-1.25226
minichromosome maintenance complex component 7	MCM7	0.037015	-1.23009
MDM2 proto-oncogene	MDM2	0.0174468	-1.20924
methionyl aminopeptidase 2	METAP2	0.0394034	-1.26049
macrophage migration inhibitory factor	MIF	0.0168418	-1.24859
marker of proliferation Ki-67	MKI67	0.00179384	-1.29511
moesin	MSN	0.0263051	-1.2072
MYB binding protein 1a	MYBBP1A	0.00150327	-1.34677
MYC proto-oncogene, bHLH transcription factor	MYC	2.23971e-07	-1.55204
nucleosome assembly protein 1 like 1	NAP1L1	0.00183993	-1.29089
asparaginyl-tRNA synthetase 1	NARS	0.0164405	-1.26141
nucleolin	NCL	5.49907e-05	-1.34312
nuclear factor of activated T cells 3	NFATC3	0.0495236	-1.35396
NME/NM23 nucleoside diphosphate kinase 1	NME1	0.0100557	-1.42331
nucleolar and coiled-body phosphoprotein 1	NOLC1	0.00163836	-1.28836
NOP56 ribonucleoprotein	NOP56	0.000623793	-1.33024
NOP58 ribonucleoprotein	NOP58	0.00474406	-1.27244
nucleophosmin 1	NPM1	0.00687101	-1.25539
nuclear distribution C, dynein complex regulator	NUDC	0.0394801	-1.28063
2'-5'-oligoadenylate synthetase 1	OAS1	0.0389887	-1.6912
ornithine decarboxylase 1	ODC1	0.0197316	-1.20893
proliferation-associated 2G4	PA2G4	0.00566089	-1.26895
phosphoribosylaminoimidazole carboxylase and phosphoribosylaminoimidazolesuccinocarboxamide synthase	PAICS	0.0172303	-1.25528
poly(ADP-ribose) polymerase 1	PARP1	0.00654381	-1.24245
programmed cell death 4	PDCD4	0.000205584	-1.54087
pyruvate dehydrogenase E1 subunit alpha 1	PDHA1	0.0181477	-1.34672
phosphoglycerate mutase 1	PGAM1	0.0300854	-1.25625
phosphoglycerate kinase 1	PGK1	0.025449	-1.22447
prohibitin	PHB	0.0416659	-1.45695
prohibitin 2	PHB2	0.00821446	-1.31734
peptidylprolyl isomerase A	PPIA	0.0055286	-1.26961
phosphatase and tensin homolog	PTEN	0.00698043	-1.3085
prothymosin alpha	PTMA	0.00253717	-1.25914
RAN binding protein 1	RANBP1	0.0352883	-1.27662
RAN binding protein 2	RANBP2	0.018388	-1.23384
RB binding protein 4, chromatin remodeling factor	RBBP4	0.00865166	-1.27065
ribosomal protein L10a	RPL10A	0.0258763	-1.28638
ribosomal protein L11	RPL11	0.0194255	-1.21701
ribosomal protein L12	RPL12	0.0342661	-1.35042
ribosomal protein L13	RPL13	0.00754815	-1.30536
ribosomal protein L14	RPL14	0.0115974	-1.29281
ribosomal protein L15	RPL15	0.0276967	-1.20902
ribosomal protein L17	RPL17	0.00148512	-1.45304
ribosomal protein L18	RPL18	0.00504747	-1.27362
ribosomal protein L19	RPL19	0.00586579	-1.25683
ribosomal protein L23	RPL23	0.0165055	-1.22304
ribosomal protein L24	RPL24	0.0192233	-1.25782
ribosomal protein L26	RPL26	0.0115522	-1.23357
ribosomal protein L27	RPL27	0.0218292	-1.20104
ribosomal protein L3	RPL3	0.00561153	-1.25596
ribosomal protein L35	RPL35	0.0130807	-1.23287
ribosomal protein L38	RPL38	0.0216265	-1.21881
ribosomal protein L4	RPL4	0.0086385	-1.2414
ribosomal protein L5	RPL5	0.0147194	-1.23887
ribosomal protein L7a	RPL7A	0.00155909	-1.3134
ribosomal protein L8	RPL8	0.0061355	-1.26352
ribosomal protein lateral stalk subunit P0	RPLP0	0.00519141	-1.24888
ribosomal protein lateral stalk subunit P1	RPLP1	0.00773812	-1.24765
ribosomal protein S11	RPS11	0.0410147	-1.20475
ribosomal protein S14	RPS14	0.0124956	-1.3598
ribosomal protein S15	RPS15	0.0265934	-1.21207
ribosomal protein S16	RPS16	0.0296873	-1.24858
ribosomal protein S18	RPS18	0.00904199	-1.24102
ribosomal protein S19	RPS19	0.013211	-1.23403
ribosomal protein S2	RPS2	0.0171806	-1.28659
ribosomal protein S23	RPS23	0.0346454	-1.242
ribosomal protein S24	RPS24	0.0147541	-1.2355
ribosomal protein S25	RPS25	0.0138842	-1.34034
ribosomal protein S27a	RPS27A	0.0320855	-1.27651
ribosomal protein S3	RPS3	0.0159156	-1.21986
ribosomal protein S6	RPS6	0.0311411	-1.21631
ribosomal protein S8	RPS8	0.0180293	-1.23063
ribosomal protein SA	RPSA	0.0091042	-1.2622
ribonucleotide reductase regulatory subunit M2	RRM2	0.0230217	-1.20677
ribosomal RNA processing 1B	RRP1B	0.00923971	-1.28004
RuvB like AAA ATPase 1	RUVBL1	0.0224309	-1.31613
SUMO1 activating enzyme subunit 1	SAE1	0.0371053	-1.28429
serine hydroxymethyltransferase 2	SHMT2	0.0277537	-1.23943
solute carrier family 16 member 1	SLC16A1	0.0434575	-1.31526
solute carrier family 7 member 5	SLC7A5	0.00202653	-1.29211
spermidine synthase	SRM	0.00206578	-1.39893
serine and arginine rich splicing factor 1	SRSF1	0.0125484	-1.25273
serine and arginine rich splicing factor 2	SRSF2	0.0119778	-1.27469
ST3 beta-galactoside alpha-2,3-sialyltransferase 1	ST3GAL1	0.00661637	-1.39352
stathmin 1	STMN1	0.0172245	-1.23216
TATA-box binding protein associated factor, RNA polymerase I subunit D	TAF1D	0.0289145	-1.24387
transgelin 2	TAGLN2	0.0355514	-1.20513
transferrin receptor	TFRC	0.00517604	-1.27922
transketolase	TKT	0.0189834	-1.27523
tumor protein D52	TPD52	0.00609004	-1.29566
triosephosphate isomerase 1	TPI1	0.00851639	-1.25072
TNF receptor associated protein 1	TRAP1	0.0351713	-1.28617
thioredoxin	TXN	0.0318346	-1.29401
thioredoxin interacting protein	TXNIP	0.000260202	-1.64355
thioredoxin reductase 1	TXNRD1	0.0329615	-1.23684
ubiquitin like modifier activating enzyme 2	UBA2	0.0421707	-1.22953
ubiquitin specific peptidase 36	USP36	0.0123202	-1.34793
valyl-tRNA synthetase 1	VARS	0.0179789	-1.26225
exportin 1	XPO1	0.0374456	-1.21473
Y-box binding protein 1	YBX1	0.0123845	-1.23176
Y-box binding protein 3	YBX3	0.0185409	-1.3396
YTH domain containing 1	YTHDC1	0.00957116	-1.31255
