# Supplementary material for: Targeting the fatty acid binding proteins disrupts multiple myeloma cell cycle progression and MYC signaling
Source: eLife. 2023 Mar 7;12:e81184. doi: 10.7554/eLife.81184 (PMC9995119; doi:10.7554/eLife.81184)
Supplement: Supplementary file 22. — Only top 30 genes shown. [file elife-81184-supp22.xlsx]

## Sheet: Table S22
Table S22. Pearson Correlation Table of FABP5 correlation with other genes in the CoMMpass MMRF dataset. Only top 30 genes shown.
	Gene	r	p	q
1	FABP5	1	0	0
2	FABP5P7	0.93877	0	0
3	ENSG00000254027	0.741916	1.01e-161	1.78e-157
4	ENO1	0.647286	1.8e-110	2.36e-106
5	RAN	0.628056	3.29e-102	3.46e-98
6	SMS	0.61788	4.57e-98	4.01e-94
7	FARSB	0.600786	1.93e-91	1.45e-87
8	YBX1	0.594181	5.5e-89	3.61e-85
9	MRTO4	0.592633	2.03e-88	1.18e-84
10	FKBP1A	0.590962	8.24e-88	4.33e-84
11	JPT1	0.586661	2.92e-86	1.4e-82
12	MCM4	0.584375	1.91e-85	8.36e-82
13	PA2G4	0.5807	3.77e-84	1.53e-80
14	CMSS1	0.572734	2.14e-81	8.04e-78
15	SNRPB	0.571542	5.44e-81	1.91e-77
16	CTPS1	0.565855	4.45e-79	1.46e-75
17	REEP4	0.563827	2.09e-78	6.48e-75
18	ACOT7	0.563415	2.87e-78	8.37e-75
19	PTMA	0.560181	3.3e-77	9.14e-74
20	MRPS35	0.559661	4.88e-77	1.28e-73
21	ADSL	0.559099	7.45e-77	1.86e-73
22	RANBP1	0.558938	8.4e-77	1.93e-73
23	TK1	0.558931	8.44e-77	1.93e-73
24	LYAR	0.558513	1.15e-76	2.53e-73
25	TUBA1B	0.555389	1.18e-75	2.48e-72
26	PES1	0.554347	2.55e-75	5.15e-72
27	NOP56	0.553774	3.88e-75	7.56e-72
28	PBDC1	0.553122	6.27e-75	1.18e-71
29	MRPL13	0.552976	6.98e-75	1.27e-71
30	ENSG00000272425	0.552663	8.78e-75	1.54e-71
