# Supplementary material for: Targeting the fatty acid binding proteins disrupts multiple myeloma cell cycle progression and MYC signaling
Source: eLife. 2023 Mar 7;12:e81184. doi: 10.7554/eLife.81184 (PMC9995119; doi:10.7554/eLife.81184)
Supplement: Supplementary file 23. — CST (Cell Signaling Technologies). [file elife-81184-supp23.xlsx]

## Sheet: Table S23
Table S23. Antibody staining for western blotting. CST (Cell Signaling Technologies).
Gene Symbol	Dilution	Diluent	Duration	Company	Catalog number
MYC	1:1000	5% BSA in TBS-T	Overnight	CST	5605
FABP5	1:1000	5% BSA in TBS-T	Overnight	CST	39926S
KRAS	1:1000	5% BSA in TBS-T	Overnight	Abcam	ab191595
HRP-linked anti-rabbit IgG	1:5000	5% BSA in TBS-T	1 hour	CST	7074
HRP-linked anti-mouse IgG	1:5000	5% BSA in TBS-T	1 hour	CST
