# Supplementary material for: Targeting the fatty acid binding proteins disrupts multiple myeloma cell cycle progression and MYC signaling
Source: eLife. 2023 Mar 7;12:e81184. doi: 10.7554/eLife.81184 (PMC9995119; doi:10.7554/eLife.81184)
Supplement: Supplementary file 24. — Forward (Fwd), Reverse (Rev); citation used if applicable. [file elife-81184-supp24.xlsx]

## Sheet: Table S24
Table S24. Primers used for reverse-transcriptase PCR. Forward (Fwd), Reverse (Rev); citation used if applicable.
Gene Symbol	Sequence (5’à3’)	Use	Citation
XBP1	CCTGGTTGCTGAAGAGGAGG	Fwd, Semi-qPCR	Herroon et al. 2018
		Rev, Semi-qPCR	Herroon et al. 2018
RPLP0	ATCACAGAGGAAACTCTGCATTCTC	Housekeeping, Fwd, qPCR & Semi-qPCR	Ohguchi et al. 2021
	TCAGCAAGTGGGAAGGTGTAATC	Housekeeping, Rev, qPCR & Semi-qPCR	Ohguchi et al. 2021
MYC	CCTCGGATTCTCTGCTCTCC	CDSFwd, qPCR	Ohguchi et al., 2021
	TTTCTTCCTCATCTTCTTGTTCCTC	CDSRev, qPCR	Ohguchi et al. 2021
KRAS	AGTCATGGTCACTCTCCCCA	Fwd, qPCR
	GCAGTCTGACACAGGGAGAC	Rev, qPCR
FABP5	TGAAGGAGCTAGGAGTGGGAAT	Fwd, qPCR
	GCTGAACCAATGCACCATCTG	Rev, qPCR
FABP4	AACCTTAGATGGGGGTGTCC	Fwd, qPCR	Fairfield et al. 2021
	TGGTTGATTTTCCATCCCAT	Rev, qPCR	Fairfield et al. 2021
FABP6	TTTCACCGGCAAGTTCGAGA	Fwd, qPCR
	CCAAGTGAAGTCCTGCCCAT	Rev, qPCR
